# Supplementary material for: Beyond green space area: How landscape structure shapes urban bird communities in a megacity
Source: Research Square preprint supplement (doi:10.21203/rs.3.rs-6858525/v1), 2025-07-17
Supplement: Supplementary file 1 [file b55dfce46e66e9625a06959c.docx]

**Beyond green space area: How landscape structure shapes urban bird communities in a megacity**

Marisela Martínez-Ruiz 1, Elio G. Lagunes-Díaz2, Jonathan Morales-Contreras3, María del Coro Arizmendi Arriaga1

Table S1. Number of individuals, number of species observed and sample coverage of 20 urban green spaces in Mexico City.

| Site code | Site name | Number of individuals | Species observed | Sample coverage |
| --- | --- | --- | --- | --- |
| 1 | ADS | 43 | 22 | 0.679 |
| 2 | Bombilla | 22 | 12 | 0.740 |
| 3 | Americas | 69 | 15 | 0.884 |
| 4 | Mexico | 34 | 11 | 0.917 |
| 5 | Reforma | 111 | 18 | 0.938 |
| 6 | Venados | 30 | 16 | 0.673 |
| 7 | Selene | 63 | 17 | 0.842 |
| 8 | Fuentes | 43 | 18 | 0.795 |
| 9 | Cuadro | 67 | 14 | 0.911 |
| 10 | BJ | 59 | 20 | 0.832 |
| 11 | Central | 69 | 16 | 0.899 |
| 12 | Jardines | 45 | 17 | 0.826 |
| 13 | Periodistas | 82 | 23 | 0.917 |
| 14 | Toriello | 36 | 18 | 0.728 |
| 15 | Macroplaza | 117 | 19 | 0.949 |
| 16 | Teresa | 93 | 25 | 0.872 |
| 17 | Salesiano | 67 | 16 | 0.881 |
| 18 | Tepeyac | 40 | 19 | 0.730 |
| 19 | Pericos | 55 | 21 | 0.782 |
| 20 | Montañas | 58 | 23 | 0.849 |

Table S2. Landscape scales of effect identified for four response variables of birds related to six landscape metrics. 0*D =* Species richness;1*D =* Diversity of order1; *EF* =Evenness Factor

| Landscape metric | Biological response |  | Scale of effect (m radius) |
| --- | --- | --- | --- |
| Forest cover | Abundance |  | 300 |
|  | 0*D* |  | 200 |
|  | *1D* |  | 200 |
|  | *EF* |  | 200 |
| Density of forest patches | Abundance |  | 800 |
|  | 0*D* |  | 700 |
|  | *1D* |  | 700 |
|  | *EF* |  | 300 |
| Grass cover | Abundance |  | 600 |
|  | 0*D* |  | 700 |
|  | *1D* |  | 700 |
|  | *EF* |  | 700 |
| Pavement cover | Abundance |  | 200 |
|  | 0*D* |  | 900 |
|  | *1D* |  | 900 |
|  | *EF* |  | 100 |
| Built cover | Abundance |  | 300 |
|  | 0*D* |  | 200 |
|  | *1D* |  | 200 |
|  | *EF* |  | 800 |
| Mean distance between forest patches | Abundance |  | 900 |
|  | 0*D* |  | 700 |
|  | *1D* |  | 600 |
|  | *EF* |  | 700 |

Table S3. Sets of models of the relationship between bird response variables and landscape metrics at different spatial scales to identify the scale of landscape effect. The scale of effect was selected as the best model for each case (dAICc = 0). AICc = Akaike’s Information Criterion with small-sample correction; dAICc = Delta AICc; df = degrees of freedom; loglik = Log-likelihood; 0*D =* Species richness;1*D =* Diversity of order1; *EF* =Evenness Factor

| **Response** | **Landscape variable** | **Spatial scale** | **AICc** | **dAICc** | **df** | **AICc weight** | **loglik** |
| --- | --- | --- | --- | --- | --- | --- | --- |
| Abundance | Forest cover | 300 | 176.31 | 0 | 4 | 0.687 | -82.82 |
|  |  | 400 | 180.18 | 3.86 | 4 | 0.100 | -84.75 |
|  |  | 500 | 180.18 | 3.86 | 4 | 0.100 | -84.75 |
|  |  | 200 | 181.15 | 4.84 | 4 | 0.061 | -85.24 |
|  |  | 600 | 182.89 | 6.58 | 4 | 0.026 | -86.11 |
|  |  | 700 | 184.77 | 8.46 | 4 | 0.010 | -87.05 |
|  |  | 800 | 185.76 | 9.44 | 4 | 0.006 | -87.54 |
|  |  | 900 | 186.05 | 9.74 | 4 | 0.005 | -87.69 |
|  |  | 100 | 186.79 | 10.47 | 4 | 0.004 | -88.06 |
|  | Pavement cover | 200 | 188.76 | 0.00 | 4 | 0.243 | -89.05 |
|  |  | 300 | 191.55 | 2.79 | 4 | 0.060 | -90.44 |
|  |  | 500 | 192.38 | 3.62 | 4 | 0.040 | -90.86 |
|  |  | 400 | 192.38 | 3.62 | 4 | 0.040 | -90.86 |
|  |  | 900 | 192.53 | 3.77 | 4 | 0.037 | -90.93 |
|  |  | 800 | 192.73 | 3.96 | 4 | 0.033 | -91.03 |
|  |  | 100 | 192.73 | 3.97 | 4 | 0.033 | -91.03 |
|  |  | 600 | 192.74 | 3.98 | 4 | 0.033 | -91.04 |
|  |  | 700 | 192.76 | 4.00 | 4 | 0.033 | -91.05 |
|  | Built cover | 300 | 181.69 | 0.00 | 4 | 0.234 | -85.51 |
|  |  | 400 | 182.25 | 0.56 | 4 | 0.177 | -85.79 |
|  |  | 500 | 182.25 | 0.56 | 4 | 0.177 | -85.79 |
|  |  | 600 | 182.80 | 1.11 | 4 | 0.135 | -86.07 |
|  |  | 200 | 183.68 | 1.99 | 4 | 0.087 | -86.51 |
|  |  | 700 | 183.70 | 2.01 | 4 | 0.086 | -86.52 |
|  |  | 800 | 185.31 | 3.62 | 4 | 0.038 | -87.32 |
|  |  | 100 | 185.91 | 4.22 | 4 | 0.028 | -87.62 |
|  |  | 900 | 186.21 | 4.52 | 4 | 0.024 | -87.77 |
|  | Patch density | 800 | 191.89 | 0.00 | 4 | 0.063 | -90.61 |
|  |  | 700 | 191.92 | 0.03 | 4 | 0.062 | -90.63 |
|  |  | 900 | 192.03 | 0.14 | 4 | 0.059 | -90.68 |
|  |  | 600 | 192.21 | 0.32 | 4 | 0.053 | -90.77 |
|  |  | 100 | 192.48 | 0.59 | 4 | 0.047 | -90.91 |
|  |  | 300 | 192.67 | 0.78 | 4 | 0.043 | -91.00 |
|  |  | 500 | 192.75 | 0.86 | 4 | 0.041 | -91.04 |
|  |  | 400 | 192.75 | 0.86 | 4 | 0.041 | -91.04 |
|  |  | 200 | 192.83 | 0.93 | 4 | 0.039 | -91.08 |
|  | MDBP | 900 | 185.17 | 0 | 4 | 0.232 | -87.25 |
|  |  | 500 | 185.59 | 0.42 | 4 | 0.188 | -87.46 |
|  |  | 700 | 186.09 | 0.92 | 4 | 0.147 | -87.71 |
|  |  | 800 | 186.54 | 1.37 | 4 | 0.117 | -87.93 |
|  |  | 600 | 186.68 | 1.51 | 4 | 0.109 | -88.01 |
|  |  | 300 | 187.56 | 2.39 | 4 | 0.070 | -88.45 |
|  |  | 400 | 188.90 | 3.73 | 4 | 0.036 | -89.12 |
|  |  | 200 | 189.60 | 4.43 | 4 | 0.025 | -89.47 |
|  |  | 100 | 192.81 | 7.64 | 4 | 0.005 | -91.07 |
|  | Grass cover | 600 | 191.11 | 0.00 | 4 | 0.077 | -90.22 |
|  |  | 500 | 191.21 | 0.11 | 4 | 0.073 | -90.27 |
|  |  | 400 | 191.21 | 0.11 | 4 | 0.073 | -90.27 |
|  |  | 700 | 191.25 | 0.15 | 4 | 0.071 | -90.29 |
|  |  | 300 | 191.57 | 0.46 | 4 | 0.061 | -90.45 |
|  |  | 800 | 192.01 | 0.91 | 4 | 0.049 | -90.67 |
|  |  | 100 | 192.11 | 1.00 | 4 | 0.047 | -90.72 |
|  |  | 200 | 192.13 | 1.02 | 4 | 0.046 | -90.73 |
|  |  | 900 | 192.13 | 1.03 | 4 | 0.046 | -90.73 |
| 0D | Forest cover | 200 | 137.15 | 0.00 | 3 | 0.070 | -64.82 |
|  |  | 600 | 137.22 | 0.07 | 3 | 0.068 | -64.86 |
|  |  | 700 | 137.22 | 0.07 | 3 | 0.068 | -64.86 |
|  |  | 500 | 137.41 | 0.26 | 3 | 0.062 | -64.96 |
|  |  | 400 | 137.41 | 0.26 | 3 | 0.062 | -64.96 |
|  |  | 800 | 137.44 | 0.29 | 3 | 0.061 | -64.97 |
|  |  | 100 | 137.47 | 0.32 | 3 | 0.060 | -64.99 |
|  |  | 900 | 137.57 | 0.42 | 3 | 0.057 | -65.04 |
|  |  | 300 | 137.70 | 0.55 | 3 | 0.053 | -65.10 |
|  | Pavement cover | 900 | 136.63 | 0.00 | 3 | 0.113 | -64.56 |
|  |  | 800 | 136.87 | 0.24 | 3 | 0.100 | -64.69 |
|  |  | 700 | 136.88 | 0.25 | 3 | 0.100 | -64.69 |
|  |  | 600 | 137.06 | 0.43 | 3 | 0.091 | -64.78 |
|  |  | 500 | 137.33 | 0.70 | 3 | 0.080 | -64.91 |
|  |  | 400 | 137.33 | 0.70 | 3 | 0.080 | -64.91 |
|  |  | 200 | 137.67 | 1.04 | 3 | 0.067 | -65.08 |
|  |  | 100 | 137.88 | 1.25 | 3 | 0.061 | -65.19 |
|  |  | 300 | 138.28 | 1.65 | 3 | 0.050 | -65.39 |
|  | Built cover | 200 | 137.40 | 0.00 | 3 | 0.083 | -64.95 |
|  |  | 100 | 137.67 | 0.27 | 3 | 0.072 | -65.08 |
|  |  | 700 | 137.77 | 0.37 | 3 | 0.069 | -65.14 |
|  |  | 600 | 137.87 | 0.47 | 3 | 0.066 | -65.18 |
|  |  | 800 | 137.94 | 0.53 | 3 | 0.063 | -65.22 |
|  |  | 300 | 138.03 | 0.63 | 3 | 0.060 | -65.27 |
|  |  | 400 | 138.08 | 0.68 | 3 | 0.059 | -65.29 |
|  |  | 500 | 138.08 | 0.68 | 3 | 0.059 | -65.29 |
|  |  | 900 | 138.11 | 0.71 | 3 | 0.058 | -65.31 |
|  | Patch density | 700 | 137.95 | 0.00 | 3 | 0.086 | -65.23 |
|  |  | 600 | 138.03 | 0.08 | 3 | 0.082 | -65.27 |
|  |  | 900 | 138.06 | 0.11 | 3 | 0.081 | -65.28 |
|  |  | 800 | 138.08 | 0.13 | 3 | 0.081 | -65.29 |
|  |  | 100 | 138.18 | 0.23 | 3 | 0.077 | -65.34 |
|  |  | 200 | 138.20 | 0.24 | 3 | 0.076 | -65.35 |
|  |  | 300 | 138.41 | 0.46 | 3 | 0.068 | -65.46 |
|  |  | 500 | 138.49 | 0.54 | 3 | 0.066 | -65.50 |
|  |  | 400 | 138.49 | 0.54 | 3 | 0.066 | -65.50 |
|  | MDBP | 700 | 136.24 | 0.00 | 3 | 0.128 | -64.37 |
|  |  | 100 | 136.32 | 0.08 | 3 | 0.123 | -64.41 |
|  |  | 600 | 136.36 | 0.11 | 3 | 0.121 | -64.43 |
|  |  | 800 | 136.80 | 0.55 | 3 | 0.097 | -64.65 |
|  |  | 500 | 137.28 | 1.04 | 3 | 0.076 | -64.89 |
|  |  | 400 | 137.84 | 1.60 | 3 | 0.058 | -65.17 |
|  |  | 900 | 138.08 | 1.84 | 3 | 0.051 | -65.29 |
|  |  | 300 | 138.44 | 2.20 | 3 | 0.043 | -65.47 |
|  |  | 200 | 138.53 | 2.29 | 3 | 0.041 | -65.52 |
|  | Grass cover | 700 | 129.20 | 0 | 3 | 0.220 | -60.85 |
|  |  | 600 | 129.41 | 0.21 | 3 | 0.198 | -60.95 |
|  |  | 800 | 131.27 | 2.07 | 3 | 0.078 | -61.88 |
|  |  | 500 | 131.60 | 2.40 | 3 | 0.066 | -62.05 |
|  |  | 400 | 131.60 | 2.40 | 3 | 0.066 | -62.05 |
|  |  | 900 | 132.81 | 3.61 | 3 | 0.036 | -62.66 |
|  |  | 300 | 133.38 | 4.18 | 3 | 0.027 | -62.94 |
|  |  | 200 | 134.30 | 5.10 | 3 | 0.017 | -63.40 |
|  |  | 100 | 137.92 | 8.72 | 3 | 0.003 | -65.21 |
| 1D | Forest cover | 200 | 124.51 | 0.00 | 4 | 0.110 | -56.92 |
|  |  | 100 | 124.96 | 0.45 | 4 | 0.088 | -57.15 |
|  |  | 300 | 125.85 | 1.34 | 4 | 0.056 | -57.59 |
|  |  | 600 | 125.85 | 1.34 | 4 | 0.056 | -57.59 |
|  |  | 500 | 125.94 | 1.43 | 4 | 0.054 | -57.64 |
|  |  | 400 | 125.94 | 1.43 | 4 | 0.054 | -57.64 |
|  |  | 700 | 126.01 | 1.50 | 4 | 0.052 | -57.67 |
|  |  | 800 | 126.30 | 1.79 | 4 | 0.045 | -57.82 |
|  |  | 900 | 126.47 | 1.96 | 4 | 0.041 | -57.90 |
|  | Pavement cover | 900 | 125.82 | 0.00 | 4 | 0.071 | -57.58 |
|  |  | 800 | 126.15 | 0.33 | 4 | 0.061 | -57.74 |
|  |  | 700 | 126.29 | 0.47 | 4 | 0.056 | -57.81 |
|  |  | 600 | 126.51 | 0.69 | 4 | 0.051 | -57.92 |
|  |  | 200 | 126.59 | 0.76 | 4 | 0.049 | -57.96 |
|  |  | 500 | 126.65 | 0.83 | 4 | 0.047 | -57.99 |
|  |  | 400 | 126.65 | 0.83 | 4 | 0.047 | -57.99 |
|  |  | 300 | 127.32 | 1.49 | 4 | 0.034 | -58.32 |
|  |  | 100 | 127.37 | 1.54 | 4 | 0.033 | -58.35 |
|  | Built cover | 200 | 125.00 | 0.00 | 4 | 0.101 | -57.16 |
|  |  | 100 | 125.43 | 0.44 | 4 | 0.081 | -57.38 |
|  |  | 300 | 126.48 | 1.48 | 4 | 0.048 | -57.91 |
|  |  | 600 | 126.55 | 1.55 | 4 | 0.047 | -57.94 |
|  |  | 700 | 126.56 | 1.57 | 4 | 0.046 | -57.95 |
|  |  | 400 | 126.74 | 1.74 | 4 | 0.042 | -58.04 |
|  |  | 500 | 126.74 | 1.74 | 4 | 0.042 | -58.04 |
|  |  | 800 | 126.87 | 1.87 | 4 | 0.040 | -58.10 |
|  |  | 900 | 127.12 | 2.12 | 4 | 0.035 | -58.23 |
|  | Patch density | 700 | 127.17 | 0.00 | 4 | 0.043 | -58.25 |
|  |  | 200 | 127.19 | 0.03 | 4 | 0.042 | -58.26 |
|  |  | 900 | 127.22 | 0.05 | 4 | 0.042 | -58.27 |
|  |  | 600 | 127.24 | 0.07 | 4 | 0.041 | -58.29 |
|  |  | 800 | 127.26 | 0.09 | 4 | 0.041 | -58.29 |
|  |  | 100 | 127.39 | 0.22 | 4 | 0.038 | -58.36 |
|  |  | 300 | 127.40 | 0.23 | 4 | 0.038 | -58.37 |
|  |  | 500 | 127.58 | 0.42 | 4 | 0.035 | -58.46 |
|  |  | 400 | 127.58 | 0.42 | 4 | 0.035 | -58.46 |
|  | MDBP | 600 | 125.70 | 0.00 | 4 | 0.074 | -57.52 |
|  |  | 700 | 125.76 | 0.07 | 4 | 0.072 | -57.55 |
|  |  | 100 | 125.90 | 0.20 | 4 | 0.067 | -57.62 |
|  |  | 800 | 126.04 | 0.34 | 4 | 0.063 | -57.68 |
|  |  | 500 | 126.34 | 0.65 | 4 | 0.054 | -57.84 |
|  |  | 400 | 126.96 | 1.26 | 4 | 0.039 | -58.14 |
|  |  | 900 | 127.13 | 1.44 | 4 | 0.036 | -58.23 |
|  |  | 300 | 127.59 | 1.89 | 4 | 0.029 | -58.46 |
|  |  | 200 | 127.59 | 1.89 | 4 | 0.029 | -58.46 |
|  | Grass | 700 | 118.53 | 0 | 4 | 0.282 | -53.93 |
|  |  | 600 | 118.74 | 0.21 | 4 | 0.255 | -54.04 |
|  |  | 800 | 120.77 | 2.24 | 4 | 0.092 | -55.05 |
|  |  | 500 | 120.95 | 2.41 | 4 | 0.084 | -55.14 |
|  |  | 400 | 120.95 | 2.41 | 4 | 0.084 | -55.14 |
|  |  | 300 | 121.46 | 2.92 | 4 | 0.065 | -55.39 |
|  |  | 900 | 122.31 | 3.78 | 4 | 0.043 | -55.82 |
|  |  | 200 | 122.83 | 4.30 | 4 | 0.033 | -56.08 |
|  |  | 100 | 127.33 | 8.80 | 4 | 0.003 | -58.33 |
| EF | forest | 200 | -22.71 | 0.00 | 4.00 | 0.056 | 16.69 |
|  |  | 300 | -22.64 | 0.07 | 4.00 | 0.054 | 16.65 |
|  |  | 700 | -22.26 | 0.44 | 4.00 | 0.045 | 16.47 |
|  |  | 800 | -22.26 | 0.44 | 4.00 | 0.045 | 16.46 |
|  |  | 100 | -22.25 | 0.46 | 4.00 | 0.044 | 16.46 |
|  |  | 900 | -22.24 | 0.46 | 4.00 | 0.044 | 16.45 |
|  |  | 500 | -22.24 | 0.47 | 4.00 | 0.044 | 16.45 |
|  |  | 400 | -22.24 | 0.47 | 4.00 | 0.044 | 16.45 |
|  |  | 600 | -22.23 | 0.47 | 4.00 | 0.044 | 16.45 |
|  | Pavement cover | 100 | -25.66 | 0.00 | 4.00 | 0.189 | 18.16 |
|  |  | 600 | -23.27 | 2.39 | 4.00 | 0.057 | 16.97 |
|  |  | 700 | -23.24 | 2.42 | 4.00 | 0.056 | 16.95 |
|  |  | 400 | -22.89 | 2.77 | 4.00 | 0.047 | 16.78 |
|  |  | 500 | -22.89 | 2.77 | 4.00 | 0.047 | 16.78 |
|  |  | 800 | -22.82 | 2.84 | 4.00 | 0.046 | 16.74 |
|  |  | 900 | -22.57 | 3.09 | 4.00 | 0.040 | 16.62 |
|  |  | 300 | -22.26 | 3.40 | 4.00 | 0.035 | 16.46 |
|  |  | 200 | -22.25 | 3.41 | 4.00 | 0.034 | 16.46 |
|  | Built cover | 800 | -24.68 | 0.00 | 3.00 | 0.079 | 16.09 |
|  |  | 900 | -24.68 | 0.00 | 3.00 | 0.079 | 16.09 |
|  |  | 100 | -24.64 | 0.05 | 3.00 | 0.078 | 16.07 |
|  |  | 700 | -24.63 | 0.05 | 3.00 | 0.077 | 16.07 |
|  |  | 200 | -24.60 | 0.09 | 3.00 | 0.076 | 16.05 |
|  |  | 600 | -24.60 | 0.09 | 3.00 | 0.076 | 16.05 |
|  |  | 300 | -24.59 | 0.09 | 3.00 | 0.076 | 16.05 |
|  |  | 400 | -24.59 | 0.09 | 3.00 | 0.076 | 16.05 |
|  |  | 500 | -24.59 | 0.09 | 3.00 | 0.076 | 16.05 |
|  | Patch density | 300 | -22.71 | 0.00 | 4.00 | 0.056 | 16.69 |
|  |  | 400 | -22.44 | 0.27 | 4.00 | 0.049 | 16.55 |
|  |  | 500 | -22.44 | 0.27 | 4.00 | 0.049 | 16.55 |
|  |  | 900 | -22.38 | 0.33 | 4.00 | 0.047 | 16.53 |
|  |  | 100 | -22.32 | 0.39 | 4.00 | 0.046 | 16.50 |
|  |  | 200 | -22.30 | 0.41 | 4.00 | 0.045 | 16.49 |
|  |  | 800 | -22.29 | 0.42 | 4.00 | 0.045 | 16.48 |
|  |  | 700 | -22.24 | 0.47 | 4.00 | 0.044 | 16.45 |
|  |  | 600 | -22.24 | 0.47 | 4.00 | 0.044 | 16.45 |
|  | MDBP | 700 | -23.63 | 0.00 | 4.00 | 0.078 | 17.15 |
|  |  | 800 | -23.47 | 0.16 | 4.00 | 0.072 | 17.07 |
|  |  | 600 | -23.24 | 0.39 | 4.00 | 0.064 | 16.95 |
|  |  | 100 | -22.87 | 0.76 | 4.00 | 0.053 | 16.77 |
|  |  | 500 | -22.67 | 0.96 | 4.00 | 0.048 | 16.67 |
|  |  | 900 | -22.62 | 1.01 | 4.00 | 0.047 | 16.65 |
|  |  | 300 | -22.45 | 1.18 | 4.00 | 0.043 | 16.56 |
|  |  | 400 | -22.41 | 1.22 | 4.00 | 0.042 | 16.54 |
|  |  | 200 | -22.33 | 1.30 | 4.00 | 0.041 | 16.50 |
|  | Grass cover | 700 | -23.62 | 0.00 | 4.00 | 0.075 | 17.14 |
|  |  | 600 | -23.59 | 0.03 | 4.00 | 0.074 | 17.13 |
|  |  | 800 | -23.33 | 0.29 | 4.00 | 0.065 | 17.00 |
|  |  | 400 | -23.11 | 0.51 | 4.00 | 0.058 | 16.89 |
|  |  | 500 | -23.11 | 0.51 | 4.00 | 0.058 | 16.89 |
|  |  | 900 | -22.96 | 0.66 | 4.00 | 0.054 | 16.81 |
|  |  | 100 | -22.33 | 1.29 | 4.00 | 0.040 | 16.50 |

Table S4. The summarized Principal Component Analysis (PCA) results from landscape structure variables measured at the scale of effect for each bird response. SD = Standard deviation. 0*D =* Species richness;1*D =* Diversity of order1; *EF* =Evenness Factor

|  | **PCA component** | **SD** | **Proportion of variance** | **Cumulative proportion** | **Eigenvalues** |
| --- | --- | --- | --- | --- | --- |
| Abundance | PC1 | 1.664 | 0.462 | 0.462 | 2.769 |
|  | PC2 | 1.193 | 0.237 | 0.699 | 1.422 |
|  | PC3 | 0.995 | 0.165 | 0.863 | 0.989 |
|  | PC4 | 0.751 | 0.094 | 0.957 | 0.564 |
|  | PC5 | 0.499 | 0.042 | 0.999 | 0.249 |
|  | PC6 | 0.082 | 0.001 | 1 | 0.007 |
| 0D | PC1 | 1.592 | 0.422 | 0.422 | 2.533 |
|  | PC2 | 1.262 | 0.265 | 0.688 | 1.592 |
|  | PC3 | 1.008 | 0.169 | 0.857 | 1.016 |
|  | PC4 | 0.724 | 0.087 | 0.944 | 0.524 |
|  | PC5 | 0.570 | 0.054 | 0.998 | 0.325 |
|  | PC6 | 0.099 | 0.002 | 1 | 0.010 |
| 1D | PC1 | 1.622 | 0.439 | 0.439 | 2.631 |
|  | PC2 | 1.257 | 0.702 | 0.263 | 1.580 |
|  | PC3 | 1.002 | 0.869 | 0.167 | 1.005 |
|  | PC4 | 0.648 | 0.070 | 0.939 | 0.420 |
|  | PC5 | 0.595 | 0.059 | 0.998 | 0.354 |
|  | PC6 | 0.099 | 0.002 | 1 | 0.010 |
| EF | PC1 | 1.548 | 0.399 | 0.399 | 2.396 |
|  | PC2 | 1.164 | 0.226 | 0.625 | 1.355 |
|  | PC3 | 1.027 | 0.176 | 0.801 | 1.056 |
|  | PC4 | 0.834 | 0.116 | 0.917 | 0.695 |
|  | PC5 | 0.598 | 0.059 | 0.976 | 0.358 |
|  | PC6 | 0.374 | 0.023 | 1 | 0.140 |

Table S5. Table of correlation coefficients and p-values from Principal Component Analysis (PCA), describing the correlation between landscape variables and each of the three main axes for each bird response evaluated.

| **Response** | **predictor** | **PC1** | **p_value** | **PC2** | **p_value** | **PC3** | **p_value** |
| --- | --- | --- | --- | --- | --- | --- | --- |
| Abundance | Forest | -0.95 | <0.001 | NA | NA | NA | NA |
|  | Pavement | NA | NA | -0.84 | <0.001 | NA | NA |
|  | Built | 0.90 | 0.00 | NA | NA | NA | NA |
|  | PD | -0.51 | <0.05 | NA | NA | 0.79 | <0.001 |
|  | MDBP | 0.88 | <0.001 | NA | NA | NA | NA |
|  | Grass | NA | NA | 0.78 | <0.001 | NA | NA |
| 0D | Forest | -0.95 | <0.001 | NA | NA | NA | NA |
|  | Pavement | NA | NA | 0.83 | <0.001 | NA | NA |
|  | Built | 0.95 | <0.001 | NA | NA | NA | NA |
|  | PD | NA | NA | NA | NA | 0.84 | <0.001 |
|  | MDBP | 0.66 | <0.001 | 0.49 | <0.05 | NA | NA |
|  | Grass | NA | NA | -0.80 | <0.001 | NA | NA |
| 1D | Forest | -0.95 | <0.001 | NA | NA | NA | NA |
|  | Pavement | NA | NA | 0.82 | <0.001 | NA | NA |
|  | Built | 0.95 | <0.001 | NA | NA | NA | NA |
|  | PD | NA | NA | NA | NA | 0.87 | <0.001 |
|  | MDBP | 0.74 | <0.001 | NA | NA | NA | NA |
|  | Grass | NA | NA | -0.84 | <0.001 | NA | NA |
| EF | Forest | -855 | <0.001 | NA | NA | NA | NA |
|  | Pavement | NA | NA | NA | NA | -0.748 | <0.001 |
|  | Built | 0.907 | <0.001 | NA | NA | NA | NA |
|  | PD | NA | NA | 0.845 | <0.001 | NA | NA |
|  | MDBP | 0.821 | <0.001 | NA | NA | NA | NA |
|  | Grass | NA | NA | 0.526 | 0.017 | 0.638 | 0.002 |


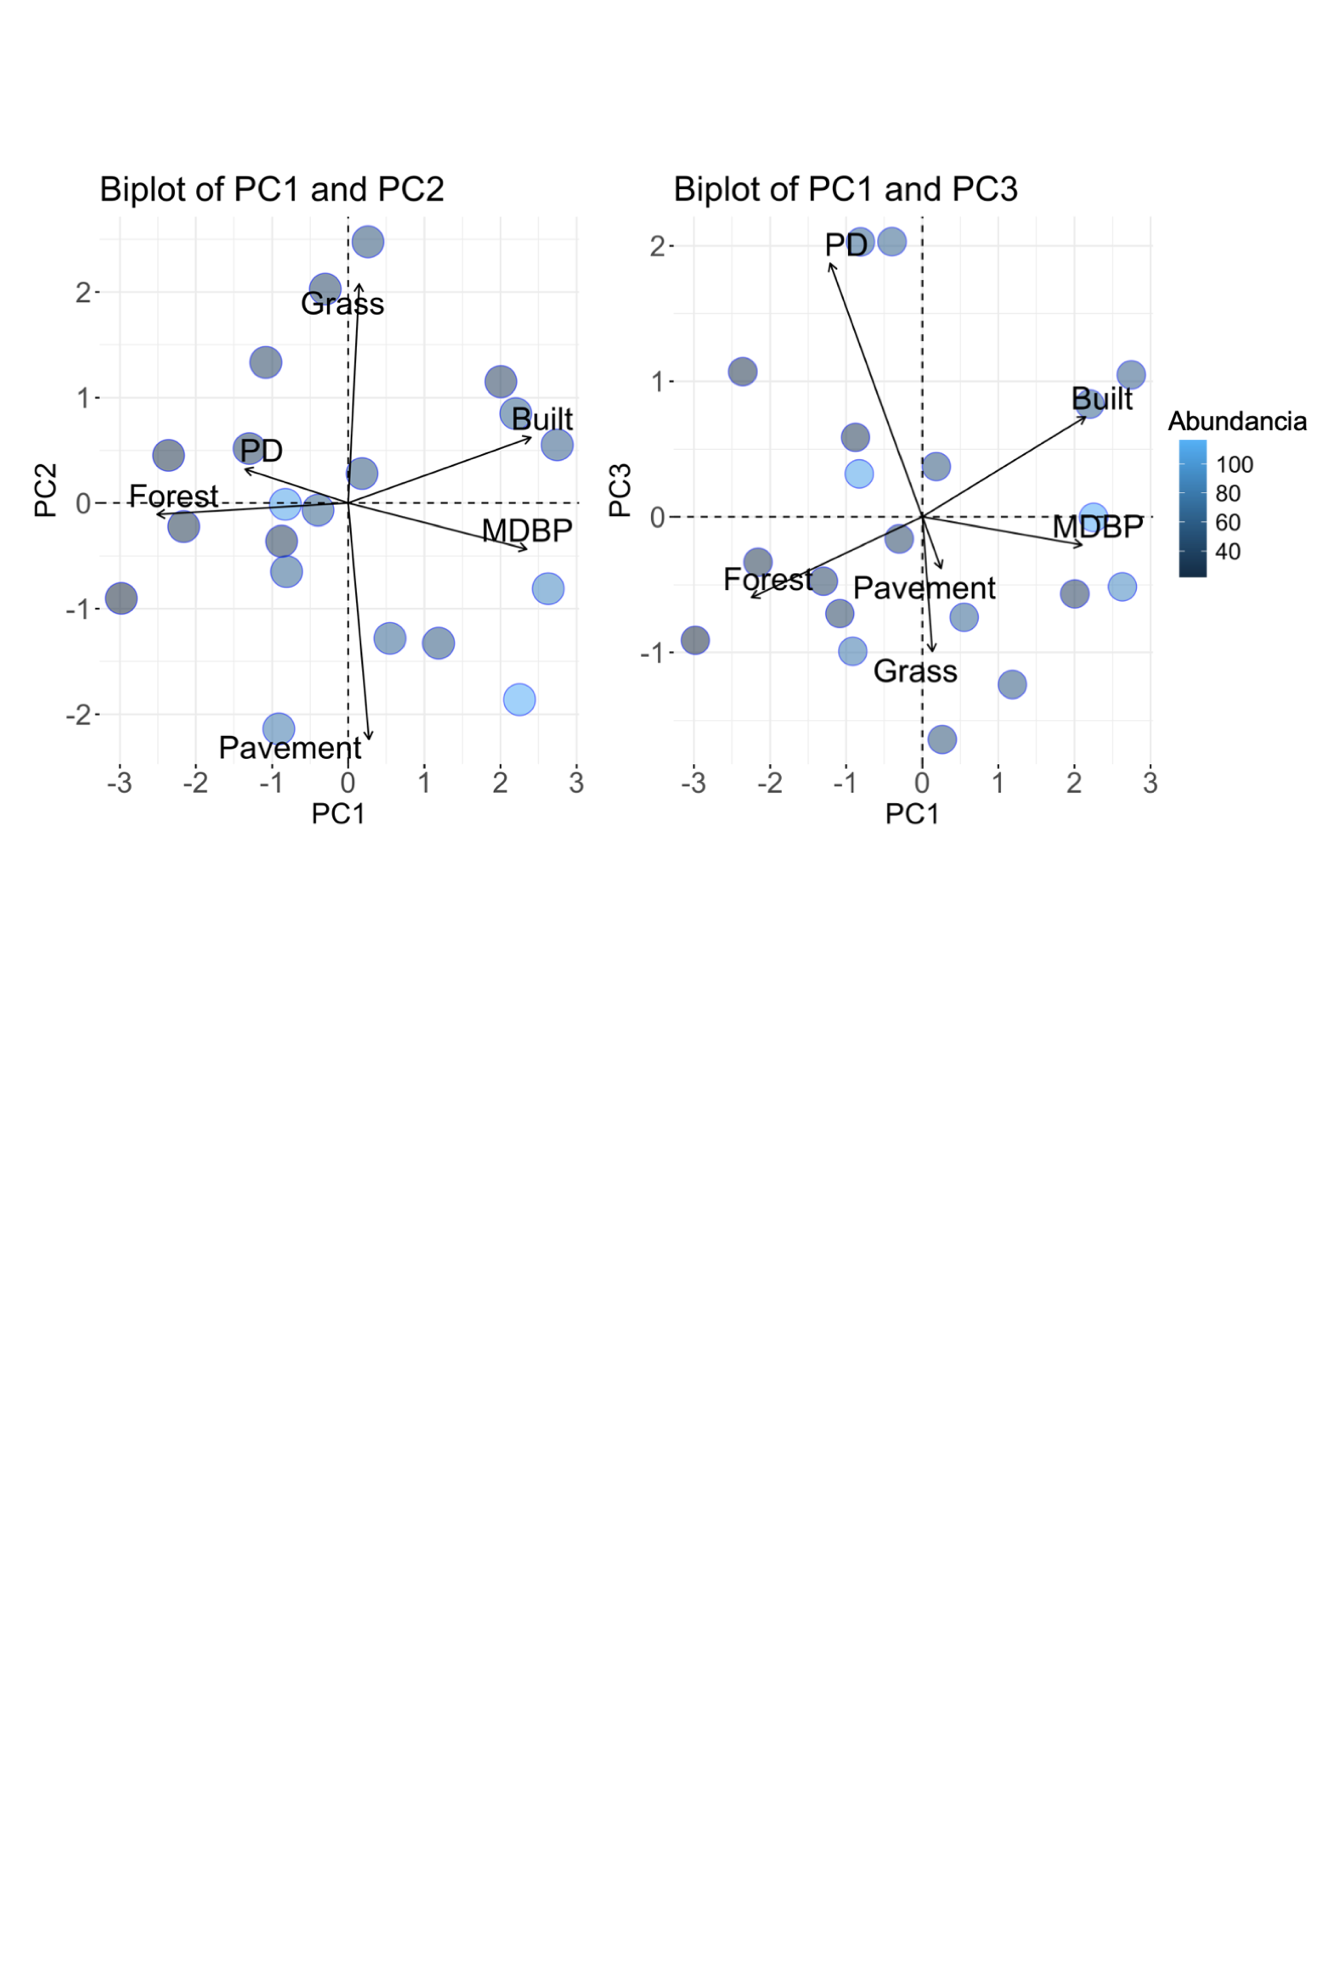


Fig S1. Principal Component Analysis ordination results showing differences in bird abundance in relation to landscape variables. The first three axes explain 86.3% of the total variance


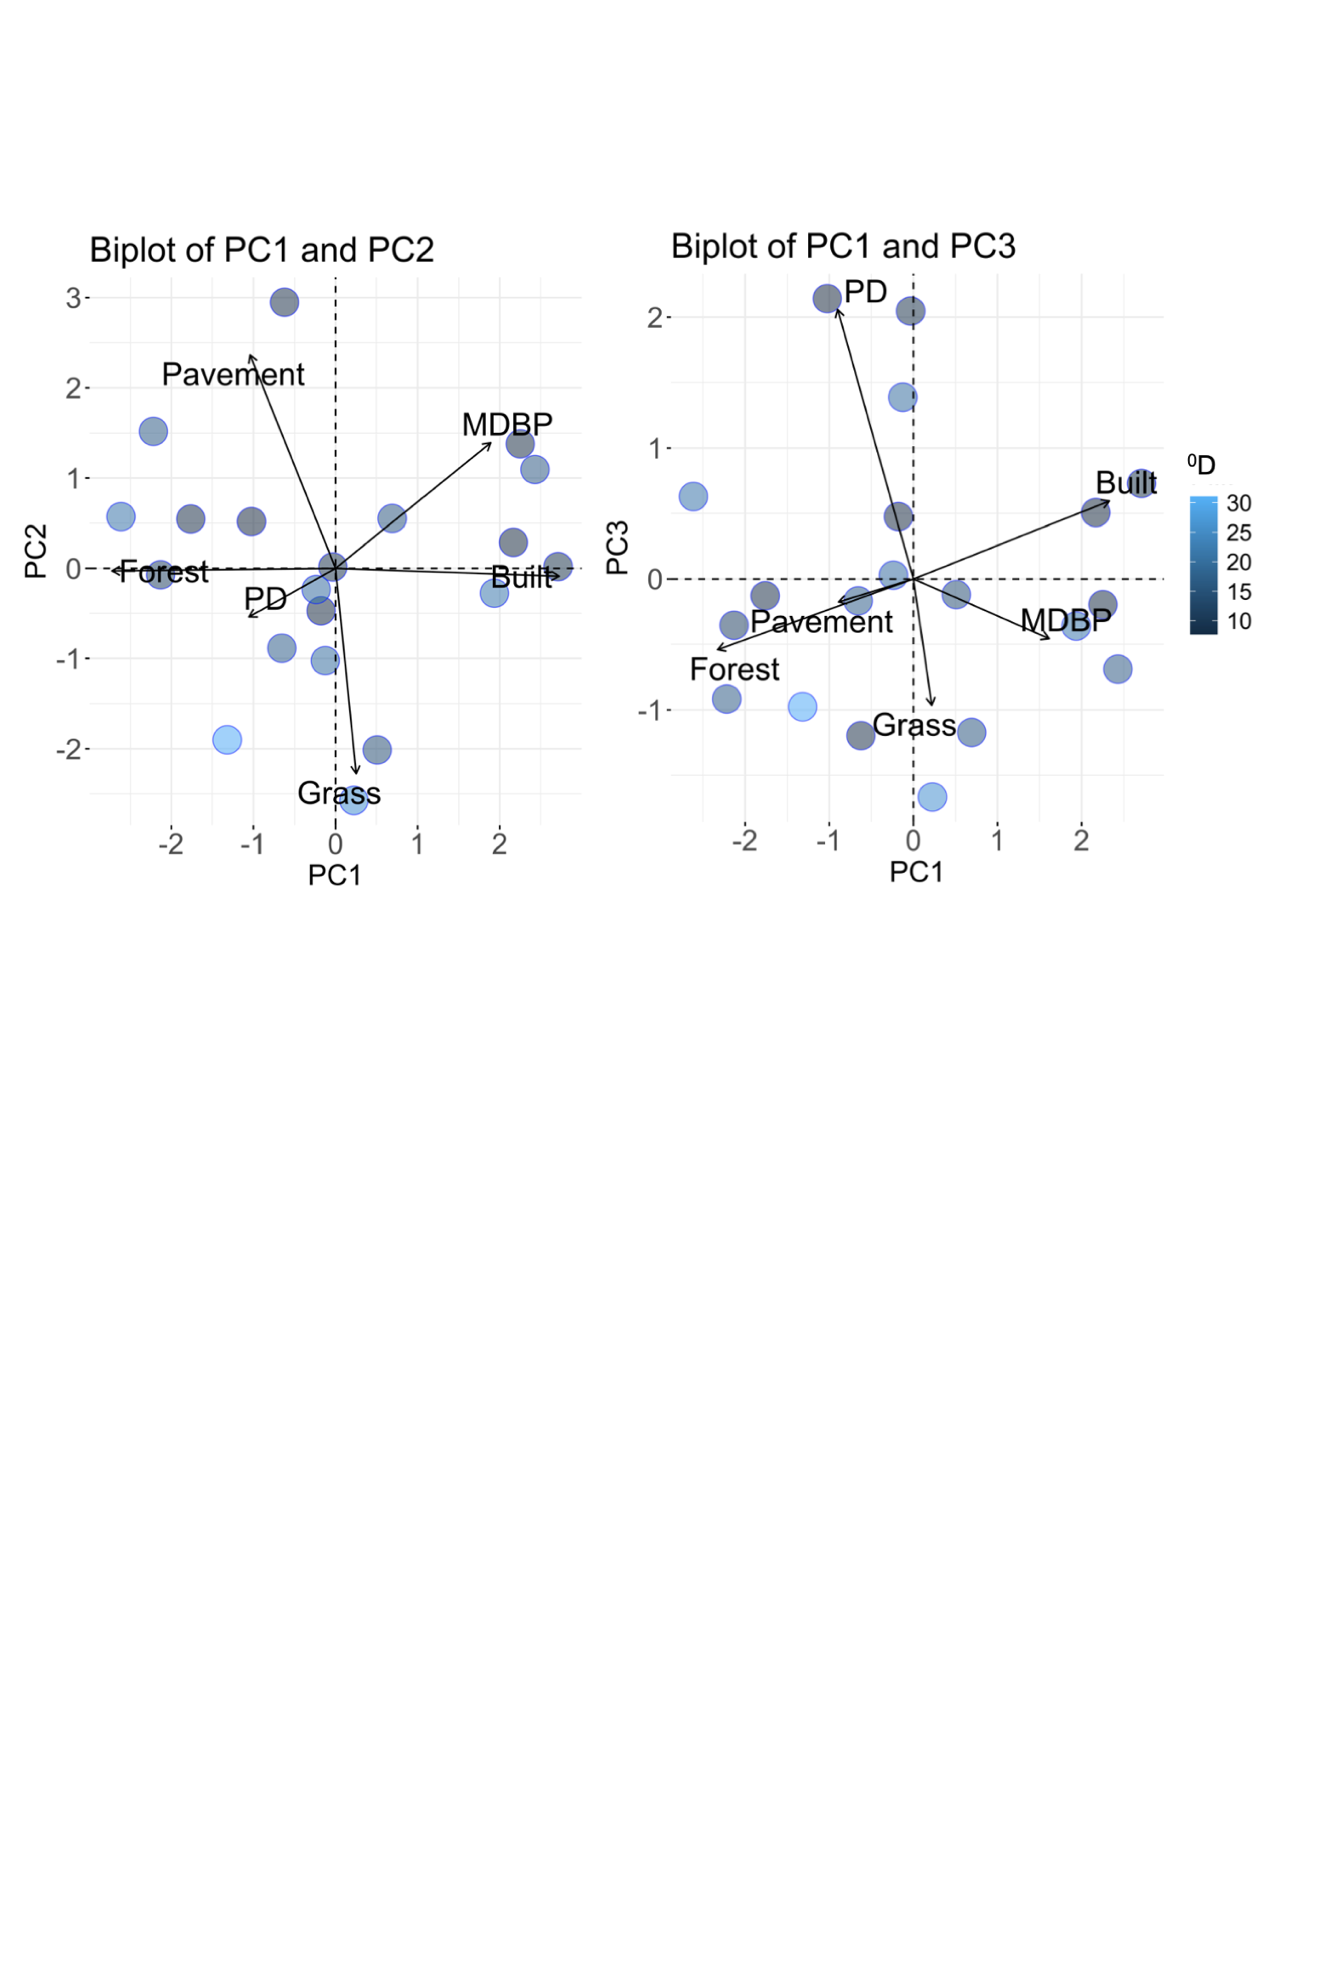


Fig S2. Principal Component Analysis ordination results showing differences in bird species richness in relation to landscape variables. The first three axes explain 85.7% of the total variationce


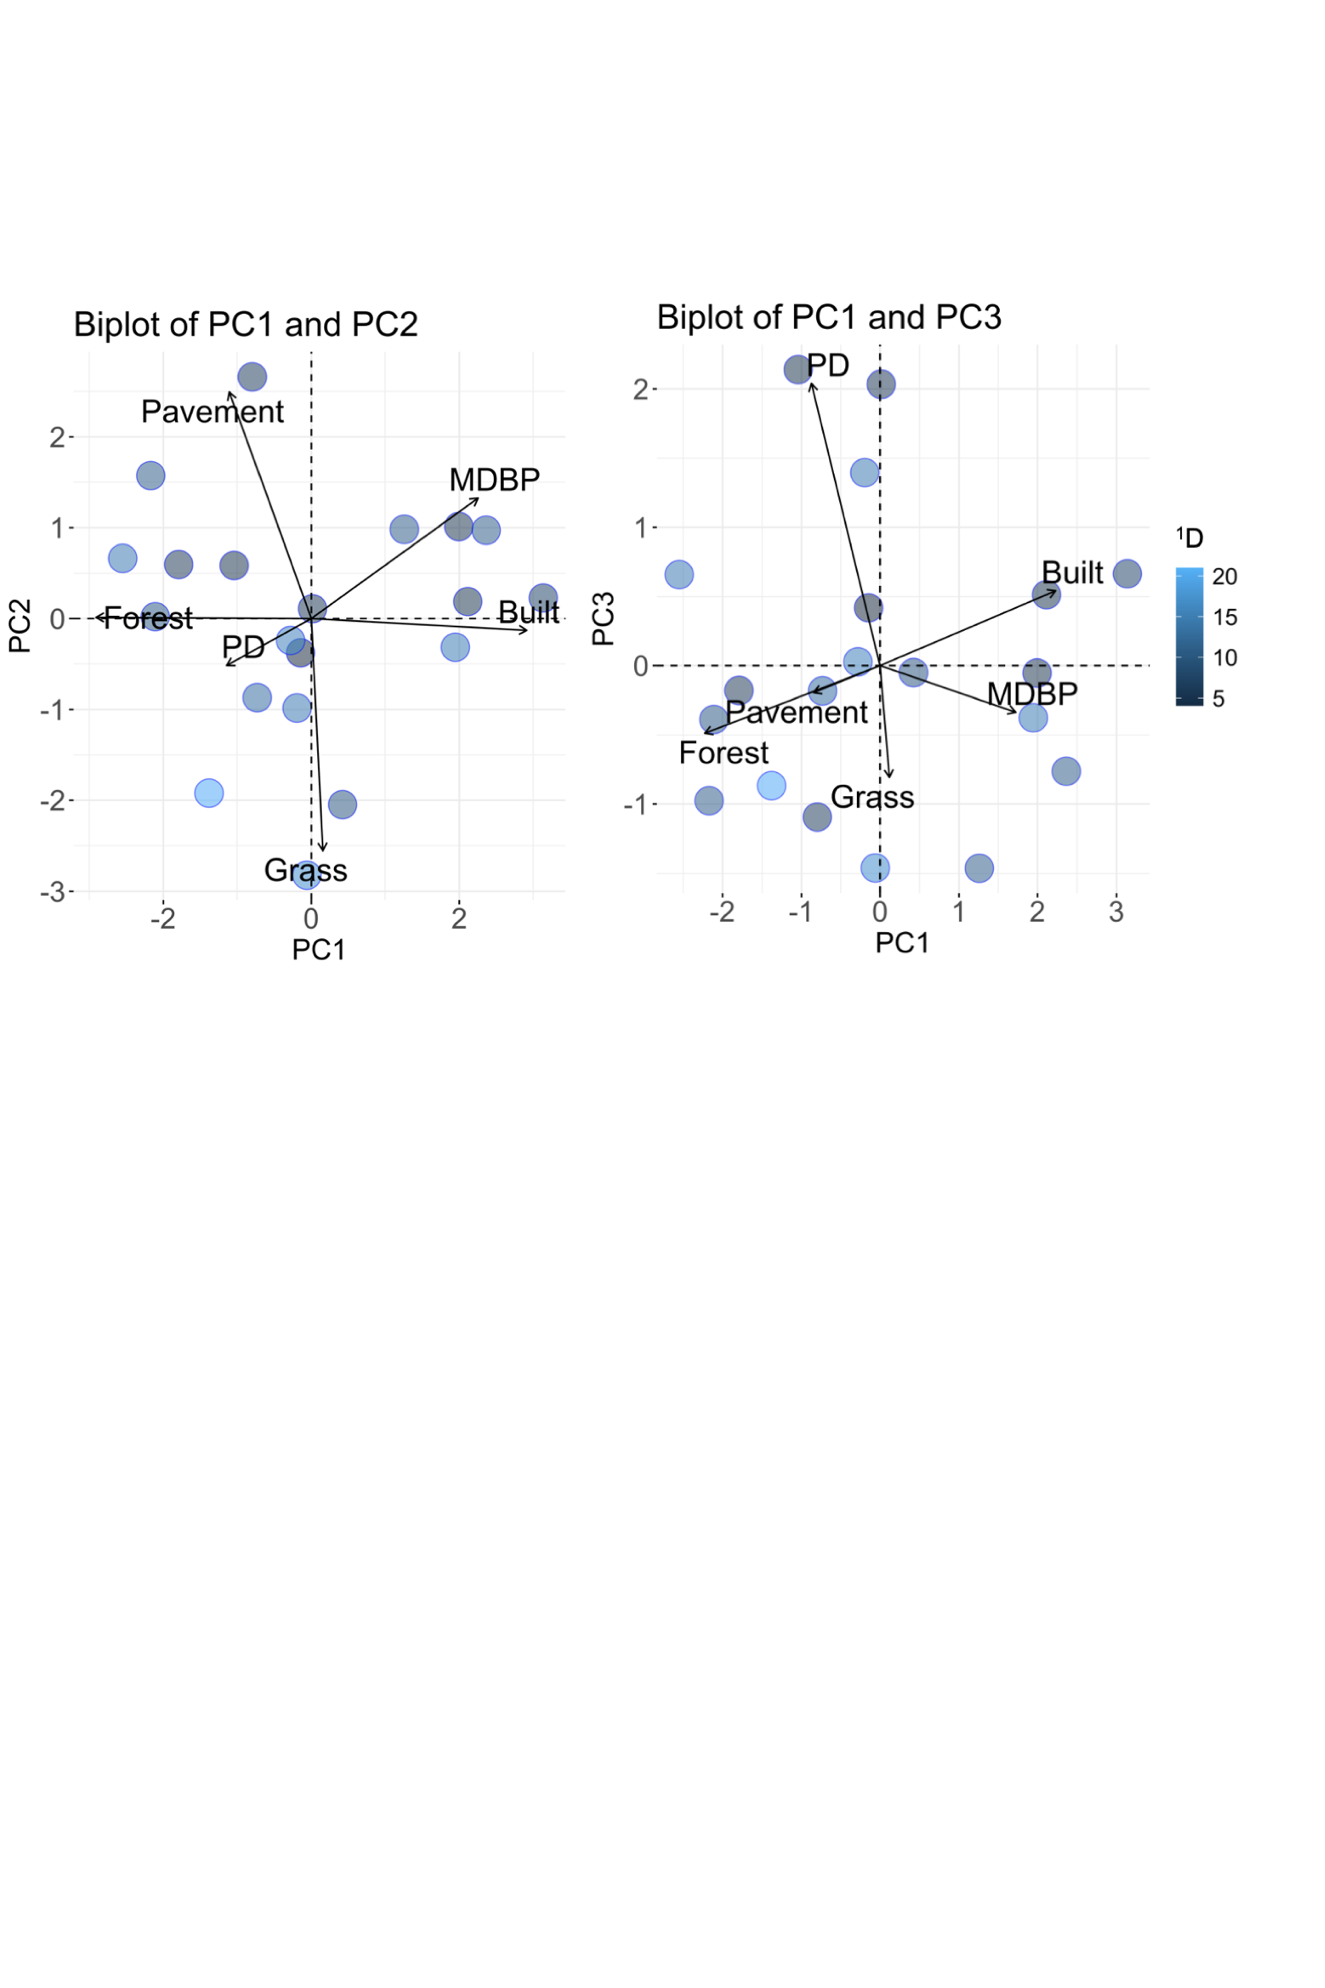


Fig S3. Principal Component Analysis ordination results showing differences in bird diversity of order 1D in relation to landscape variables. The first three axes explain 86.9% of the total variance


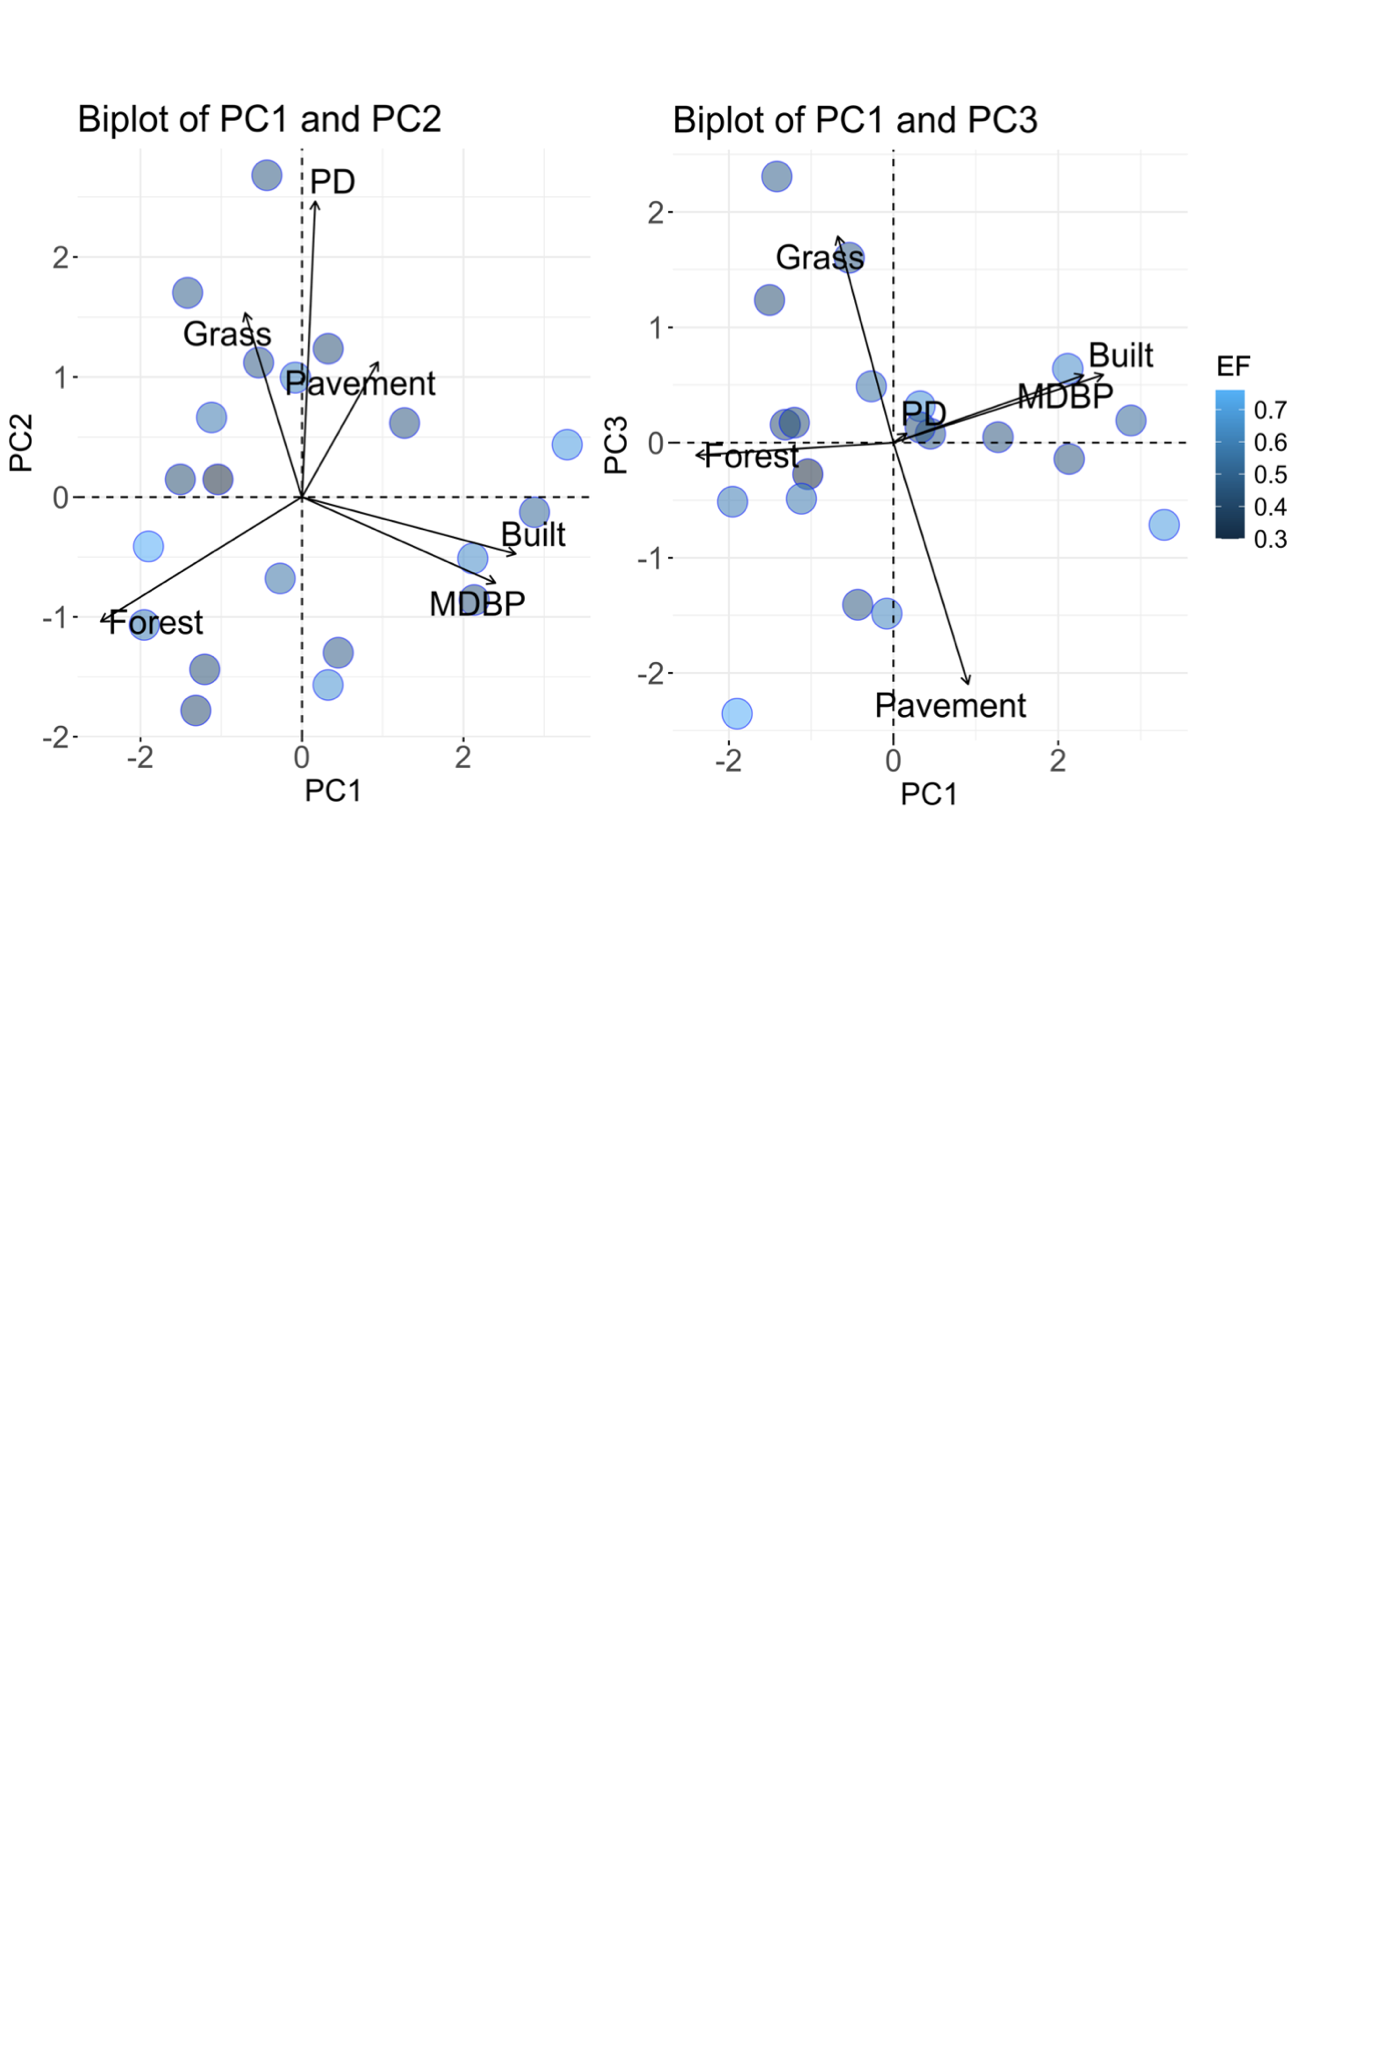


Fig S4. Principal Component Analysis ordination results showing differences in the evenness factor estimated for bird assemblages in relation to landscape variables. The first three axes explain 80.1% of the total variance
